# Supplementary material for: A new turn-on fluorescent sensor based on NBD for highly selective detection of Hg2+ in aqueous media and imaging in live cells
Source: Royal Society of Chemistry journal article supplement (doi:10.1039/c4ay00729h), 2014-01-01

## Supporting Information

### **A New Turn-On Fluorescent Sensor Based on NBD for Highly Selective Detection of Hg<sup>2+</sup> in Aqueous Media and Imaging in Live Cells**

Youming Shen,<sup>ab</sup> Youyu Zhang,<sup>\*b</sup> Xiangyang Zhang,<sup>\*a</sup> Chunxiang Zhang,<sup>a</sup> Linli Zhang,<sup>b</sup> Junling Jin,<sup>a</sup> Haitao Li,<sup>b</sup> Shouzhuo Yao<sup>b</sup>

<sup>a</sup> College of Chemistry and Chemical Engineering, Hunan University of Arts and Science, ChangDe, 415000, PR China E-mail:zhangxiangy06@163.com

<sup>b</sup> Key Laboratory of Chemical Biology and Traditional Chinese Medicine Research (Ministry of Education), College of Chemistry and Chemical Engineering, Hunan Normal University, Changsha 410081, PR China E-mail: zhangyy@hunnu.edu.cn

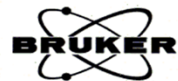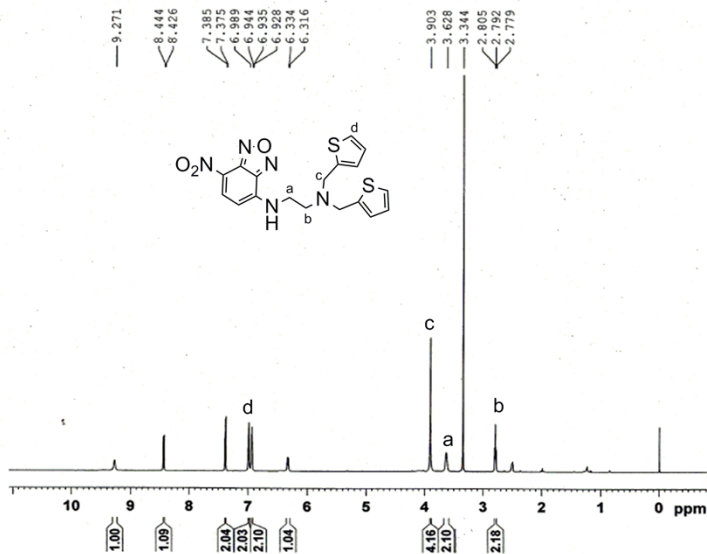

NAME weimingjie20111219  
EXPNO 1  
PROCNO 1  
Date\_ 20111219  
Time 15.12  
INSTRUM spect  
PROBHD 5 mm PABBO BB-  
PULPROG zg30  
TD 65536  
SOLVENT DMSO  
NS 16  
DS 2  
SWH 10330.578 Hz  
FIDRES 0.157632 Hz  
AQ 3.1719923 sec  
RG 287  
DW 48.400 usec  
DE 6.50 usec  
TE 293.8 K  
D1 1.00000000 sec  
TDO 1

CHANNEL f1 =====  
NUC1 1H  
P1 14.60 usec  
PL1 2.00 dB  
PL1W 9.90558243 W  
SF01 500.1330885 MHz  
SI 32768  
SF 500.1300062 MHz  
WDW no  
SSB 0  
LB 0.00 Hz  
GB 0  
PC 1.00

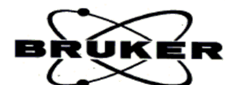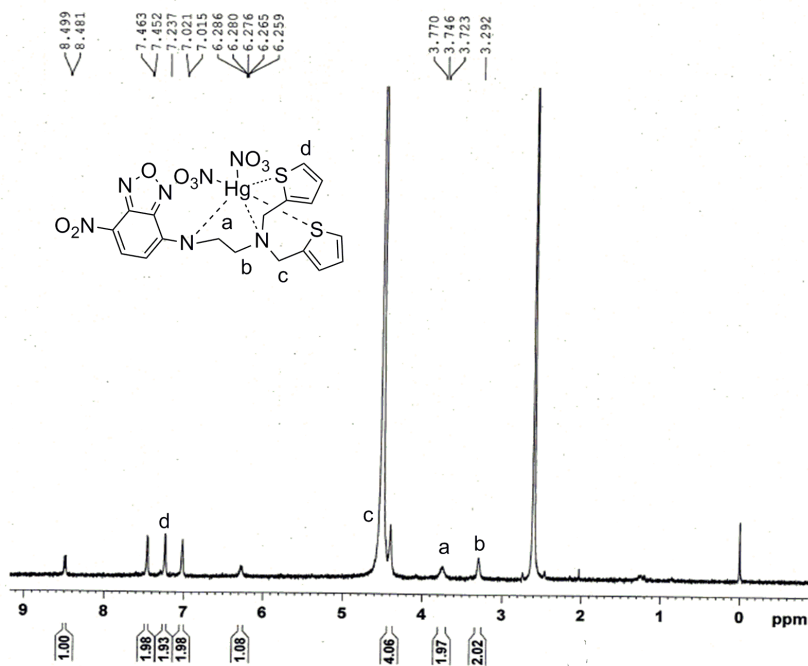

NAME weimingjie20111219  
EXPNO 3  
PROCNO 1  
Date\_ 20111219  
Time 16.16  
INSTRUM spect  
PROBHD 5 mm PABBO BB-  
PULPROG zg30  
TD 65536  
SOLVENT DMSO  
NS 16  
DS 2  
SWH 10330.578 Hz  
FIDRES 0.157632 Hz  
AQ 3.1719923 sec  
RG 287  
DW 48.400 usec  
DE 6.50 usec  
TE 293.4 K  
D1 1.00000000 sec  
TDO 1

CHANNEL f1 =====  
NUC1 1H  
P1 14.60 usec  
PL1 2.00 dB  
PL1W 9.90558243 W  
SF01 500.1330885 MHz  
SI 32768  
SF 500.1299571 MHz  
WDW no  
SSB 0  
LB 0.00 Hz  
GB 0  
PC 1.00

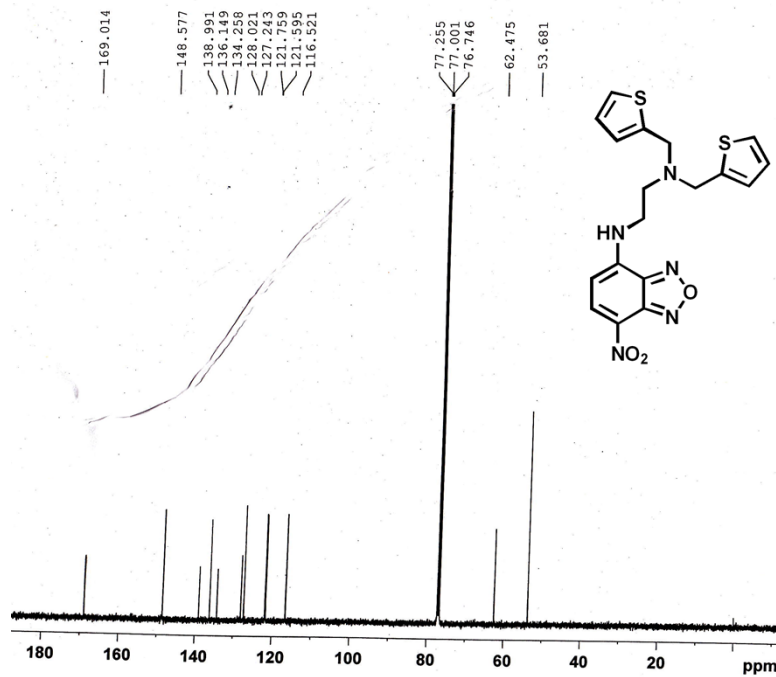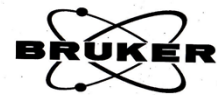

NAME weimingjie20120104  
EXPNO 1  
PROCNO 1  
Date 20120104  
Time 18.14  
INSTRUM spect  
PROBHD 5 mm PABBO BB-  
PULPROG zgpg30  
TD 65536  
SOLVENT CDCl3  
NS 430  
DS 4  
SWH 29761.904 Hz  
FIDRES 0.454131 Hz  
AQ 1.1010548 sec  
RG 2050  
DW 16.800 usec  
DE 6.50 usec  
TE 296.2 K  
D1 2.0000000 sec  
D11 0.0300000 sec  
TD0 1

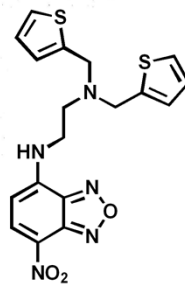

===== CHANNEL f1 =====  
NUC1 13c  
P1 9.80 usec  
PL1 2.80 dB  
PL1W 52.46661758 W  
SFO1 125.7703643 MHz

===== CHANNEL f2 =====  
CPDPRG2 waltz16  
NUC2 1h  
PCPD2 80.00 usec  
FL2 2.00 dB  
FL12 16.89 dB  
FL13 16.70 dB  
FL2W 9.90558243 W  
FL12W 0.32127732 W  
FL13W 0.33564481 W  
SFO2 500.1320005 MHz  
SI 32768  
SF 125.7577955 MHz  
WDW EM  
SSB 0  
LB 1.00 Hz  
GB 0  
PC 1.40

+C1: 30 MCA scans from Sample 1 (2# 01) of 20111206.wiff (Turbo Spray)

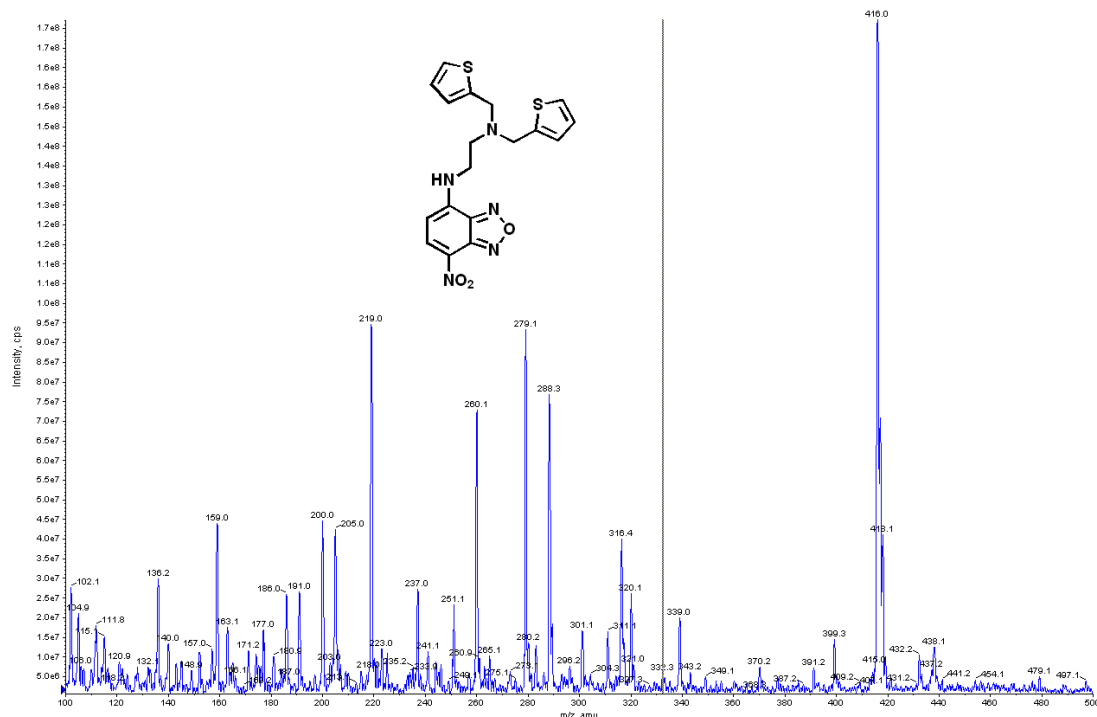

+Q1: 30 MCA scans from Sample 3 (2# Q1) of 20111206.wiff (Turbo Spray)

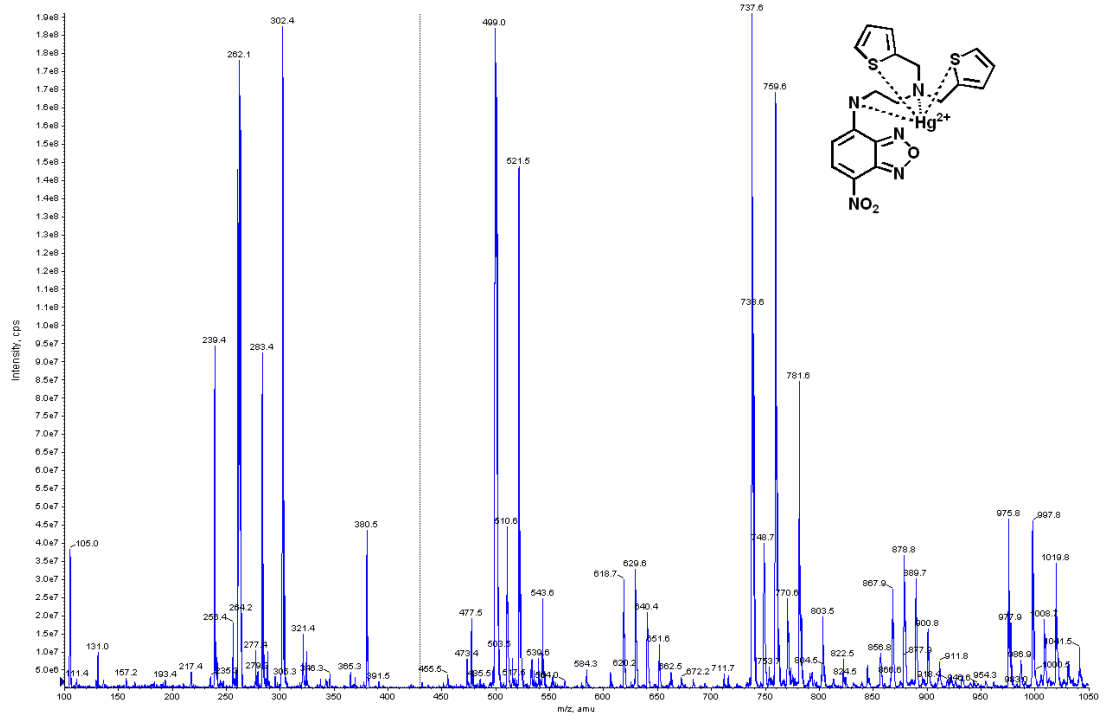

Supplement: c4ay00729h1.pdf [file c4ay00729h1.pdf]
